# Supplementary material for: Macrophage morphological plasticity and migration is Rac signalling and MMP9 dependant
Source: Sci Rep. 2021 May 12;11:10123. doi: 10.1038/s41598-021-88961-7 (PMC8115330; doi:10.1038/s41598-021-88961-7)
Supplement: Supplementary file 1 — Supplementary Information 1. [file 41598_2021_88961_MOESM1_ESM.pdf]

## Supplementary Information

to

### **Macrophage morphological plasticity and migration is Rac signalling and MMP9 dependant**

---

Jana Travnickova<sup>1,2</sup>, Sandra Nhim<sup>1</sup>, Naoill Abdellaoui<sup>1</sup>, Farida Djouad<sup>3</sup>, Mai Nguyen-Chi<sup>4</sup>,

Andrea Parmeggiani<sup>1,5</sup> and Karima Kissa<sup>1,\*</sup>

<sup>1</sup> LPHI, CNRS, INSERM, Univ Montpellier, Montpellier, France - Emergence of haematopoietic stem cells and cancer

<sup>2</sup> MRC Human Genetics Unit, and CRUK Edinburgh Centre, MRC Institute of Genetics and Molecular Medicine, Western General Campus, University of Edinburgh, Edinburgh EH4 2XU, UK

<sup>3</sup>IRMB, Inserm U1183, CHU Saint Eloi- Cellules souches, Blastème et Régénération, F-34295, Montpellier, France

<sup>4</sup> LPHI, CNRS, INSERM, Univ Montpellier, Montpellier, France - Mise en place de l'immunité et inflammation

<sup>5</sup> Laboratoire Charles Coulomb, CNRS, Univ Montpellier, Montpellier, France

\* Correspondence: karima.kissa-marin@umontpellier.fr

<sup>2</sup> Current adress

**Supplementary Table S1.** Measured average values ( $\pm$  s.e.m.) of shape descriptors for each shape subgroup. N = 20 embryos.

| Shape     | Circularity      | Roundness       | Elongation factor |
|-----------|------------------|-----------------|-------------------|
| Round     | 0.19 $\pm$ 0.01  | 0.65 $\pm$ 0.04 | 1.55 $\pm$ 0.10   |
| Amoeboid  | 0.07 $\pm$ 0.004 | 0.49 $\pm$ 0.01 | 2.04 $\pm$ 0.05   |
| Star-like | 0.07 $\pm$ 0.004 | 0.70 $\pm$ 0.01 | 1.56 $\pm$ 0.07   |
| Elongated | 0.07 $\pm$ 0.005 | 0.35 $\pm$ 0.01 | 3.45 $\pm$ 0.14   |

## Supplementary Figure S1

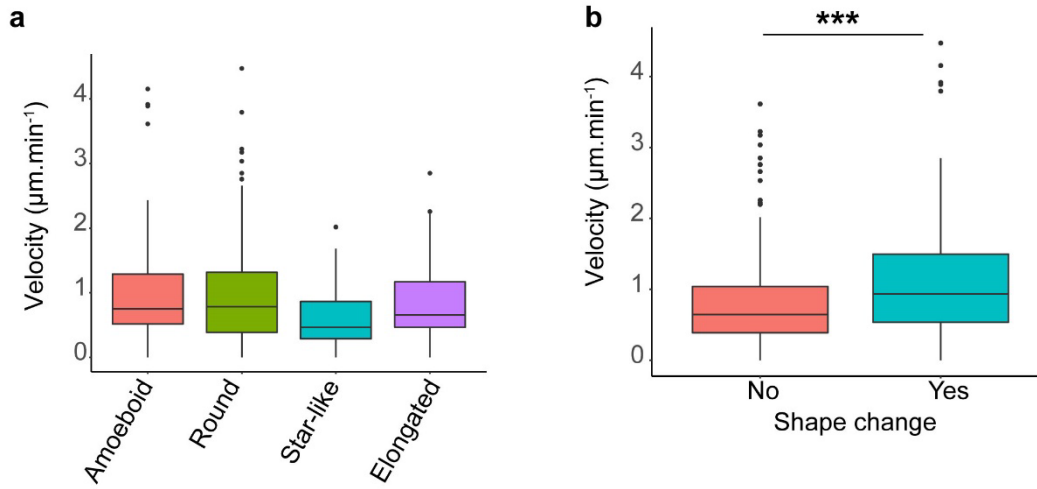

### Supplementary Figure S1. Correlation between cell shape and instantaneous velocity.

**(a)** Box plot shows the comparable macrophage instantaneous velocity for each shape. **(b)** Box plot shows significantly higher speed of macrophages actively changing the shape. \*\*\*  $p < 0.001$ , Mann-Whitney test. For each macrophage, and at each time point of imaging acquisition (every minute), the distance travelled by each macrophage was measured.

## Supplementary Figure S2

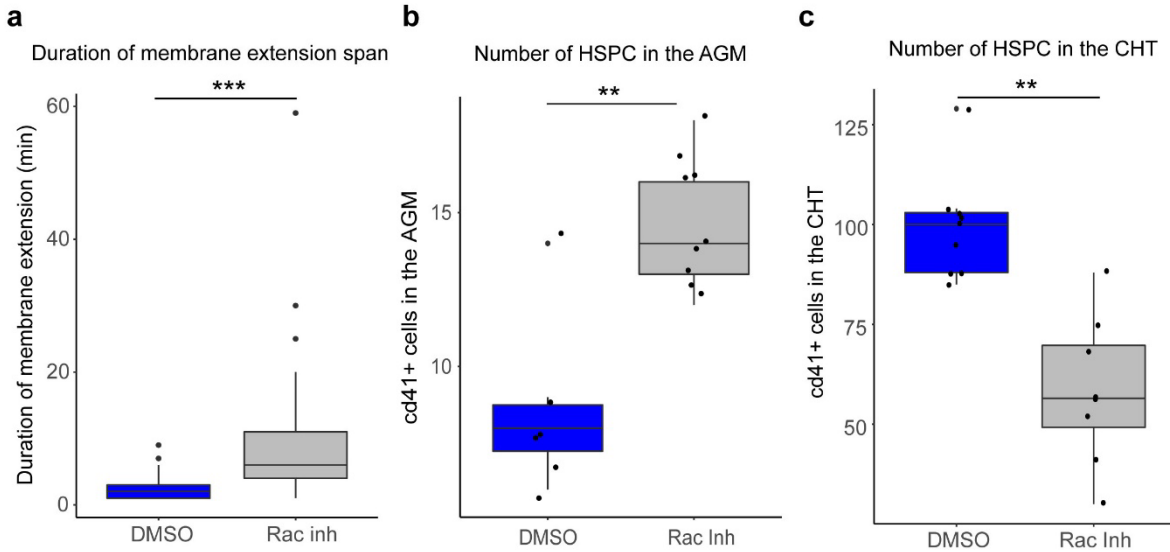

## Supplementary Figure S2. Effect of Rac inhibition on macrophage membrane extensions and HSPC mobilisation and colonisation.

(a) Graph shows the macrophage membrane single extension span between control and Rac inhibition. \*\*\*  $p < 0.001$ ,  $n = 45$  extensions. (b-c) Box dot plots show number of HSPC in the AGM (b) or CHT (c) of embryos treated with Rac inhibitor compared to DMSO treated control. \*\*  $p < 0.01$ , each dot represents one embryo. All tests: Mann-Whitney test.

**Video 1.** Macrophage 3D migration in the AGM during haematopoiesis.

Representative time-lapse colour-depth projections of *Tg(mpeg1:mCherry)* embryo at 46 hpf illustrate macrophages migration occurring in a non-directional manner and through different depth by appropriately changing colour . Image stacks were acquired every minute over 60 minutes at a 1  $\mu\text{m}$  interval with 1024x256 pixel resolution using the LSM510 Zeiss confocal microscope equipped with a 40x water immersion objective. Scale bar 30  $\mu\text{m}$ , time code in hours and minutes.

**Video 2.** The migratory behaviour of macrophage changes after Rac inhibition.

Combined representative time-lapse colour-depth projections of *Tg(mpeg1:mCherry)* embryos at 46 hpf draws a comparison between macrophage migration in DMSO-treated (control, top) embryos and that of Rac-inhibitor (Rac inh, bottom) treated embryos. Rac-inhibited macrophages display slower migration modes. They change shapes and migration direction less often, and form very long membrane extensions. Image stacks were acquired every minute over 60 minutes at a 1  $\mu\text{m}$  interval with 1024x256 pixel resolution using the LSM510 Zeiss confocal microscope equipped with a 40x water immersion objective. Scale bar 30  $\mu\text{m}$ , time code in hours and minutes.

**Video 3.** MMP inhibition induces mesenchymal-amoeboid transition of macrophage migration.

Combined representative time-lapse colour-depth projections of *Tg(mpeg1:mCherry)* embryos at 46 hpf draw a comparison between macrophage migration in DMSO-treated (control, top) and MMP-2 and 9 inhibitor (MMP inh, bottom) treated embryos. MMP-inhibited macrophages migrate faster, adopt a round shape, change the depth of their displacement less often and migrate partially

inside the bloodstream. Image stacks were acquired every minute over 60 minutes at 1  $\mu\text{m}$  interval with 1024x256 pixel resolution using the LSM510 Zeiss confocal microscope equipped with a 40x water immersion objective. Scale bar 30  $\mu\text{m}$ , time code expressed in hours and minutes.
